# Supplementary material
Source: Research Square preprint supplement (doi:10.21203/rs.3.rs-9227037/v1)
Supplement: Supplementary file 1 [file 4aa4fce034c4af77c767fe57.docx]

| **Table 2.** Comparison of baseline serum creatinine and eGFR levels with post-procedure timepoints and associated p-values. | | | | |
| --- | --- | --- | --- | --- |
| **Time Point** | **sCr (mg/dL)** | **eGFR** | **sCr Sig.** | **eGFR Sig.** |
| **Baseline** | 2.13 ± 0.55 | 35.83 ± 11.38 | — | — |
| **24 Hours** | 1.93 ± 0.56 | 41.44 ± 12.70 | **p < 0.001** | **p < 0.001** |
| **48 Hours** | 1.84 ± 0.50 | 42.94 ± 14.39 | **p < 0.001** | **p < 0.01** |
| **72 Hours** | 1.86 ± 0.54 | 43.39 ± 15.75 | **p < 0.001** | **p < 0.01** |
