# Supplementary material
Source: Research Square preprint supplement (doi:10.21203/rs.3.rs-9227037/v1)
Supplement: Supplementary file 2 [file edcf2542516d5a486aa44b18.docx]

| Table I. Baseline patient demographics and procedural details | |
| --- | --- |
| Patients (n) | 18 |
| Limbs | 18 |
| Mean age (years) | 73 ± 9 (58-88) |
| Diabetes mellitus | 17/18 (94.4%) |
| Coronary disease | 9/18 (50%) |
| Smoking | 6/18 (33.3%) |
| Hyperlipidemia | 18/18 (100.0%) |
| Hypertension | 18/18 (100.0%) |
| Mean body mass index (range) | 26.7 ± 5.2 kg/m2 (20.7- 37.8) |
| CLTI stage |  |
| Rutherford 4 | 2/18 (11.1%) |
| Rutherford 5  Rutherford 6 | 9/18 (50.0%)  7/18 (38.9%) |
| Calcifications: |  |
| None | 0/18 (0.0%) |
| Mild | 2/18 (11.1%) |
| Moderate | 6/18 (33.3%) |
| Severe | 10/18 (55.6%) |
| Lesion location |  |
| Femoropopliteal only | 10/18 (55.5%) |
| BTK only | 3/18 (16.6%) |
| Femoropopliteal and BTK | 5/18 (27.7%) |
| Pedal arch | 3/18 (16.6%) |
| Occlusions | 7/18 (38.8%) |
| Subintimal crossing | 3/7 (42.8%) |
| Endovascular treatment |  |
| Balloon angioplasty | 18/18 (100.0%) |
| Stenting | 4/18 (22.2%) |
| Atherectomy | 1/18 (5.5%) |
| Continuous data are presented as mean ± standard deviation.  Categorical data are presented as counts and percentages in the parentheses. | |
